# Supplementary material for: Coordination polymer templated engineering of YVO4:Eu submicron crystals and photoluminescence
Source: Royal Society of Chemistry journal article supplement (doi:10.1039/c9ce01907c), 2020-01-01
Supplement: c9ce01907c1.pdf [file c9ce01907c1.pdf]

## **Coordination polymer templated engineering of YVO<sub>4</sub>:Eu submicron crystals and photoluminescence**

Sai Huang,<sup>abc</sup> Zhenshu Fan,<sup>ab</sup> Qi Zhu,<sup>ab</sup> Xiaodong Li,<sup>ab</sup> Xudong Sun,<sup>abd</sup> Ji-Guang Li<sup>c\*</sup>

<sup>a</sup> Key Laboratory for Anisotropy and Texture of Materials (Ministry of Education), School of Materials Science and Engineering, Northeastern University, Shenyang, Liaoning 110819, China

<sup>b</sup> Institute of Ceramics and Powder Metallurgy, School of Materials Science and Engineering, Northeastern University, Shenyang, Liaoning 110819, China

<sup>c</sup> Research Center for Functional Materials, National Institute for Materials Science, Namiki 1-1, Tsukuba, Ibaraki 305-0044, Japan

<sup>d</sup> School of Environmental and Chemical Engineering, Dalian University, Dalian, Liaoning 116622, China

\*Corresponding author

Dr. Ji-Guang Li

National Institute for Materials Science

Tel: +81-29-860-4394

E-mail: LI.Jiguang@nims.go.jp

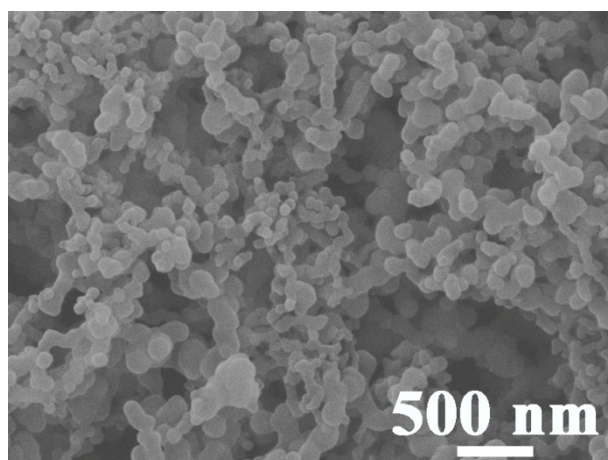

**Fig. S1** FE-SEM image of the CP precursor.

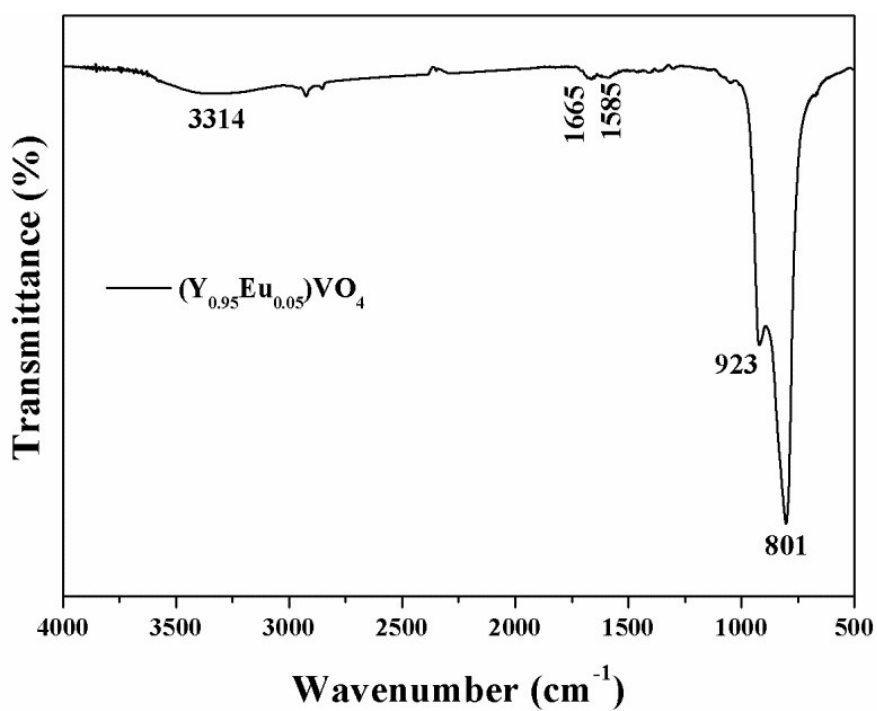

**Fig. S2** FTIR spectrum of the  $(Y_{0.95}Eu_{0.05})VO_4$  cuboids hydrothermally synthesized at 180 °C for 24 h under  $VO_4^{3-}/(Y_{0.95}Eu_{0.05})^{3+}$  molar ratio  $R = 1.0$ .

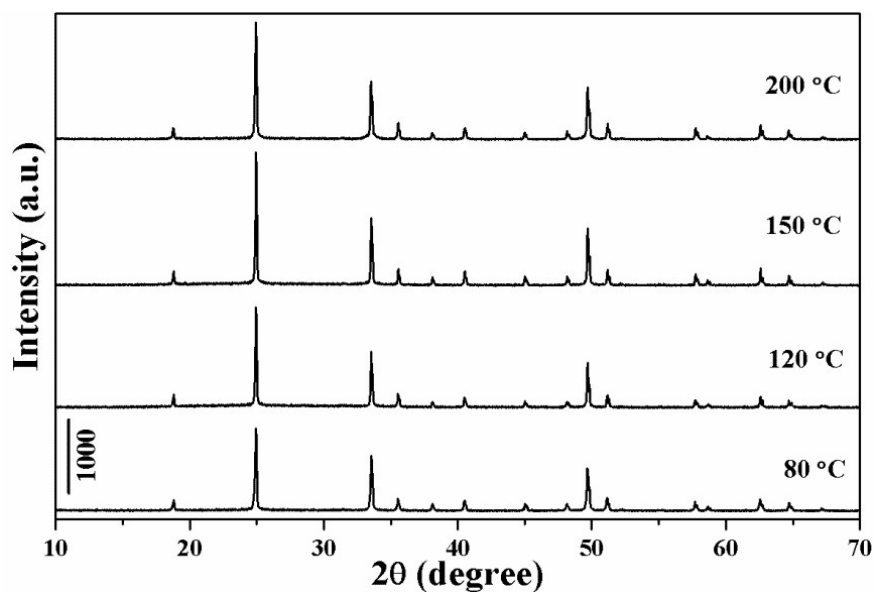

**Fig. S3** XRD patterns of the products synthesized via hydrothermal reaction under different temperatures (80-200 °C) for 24 h, where  $\text{VO}_4^{3-}/(\text{Y}_{0.95}\text{Eu}_{0.05})^{3+}$  molar ratio  $R = 1.0$ .

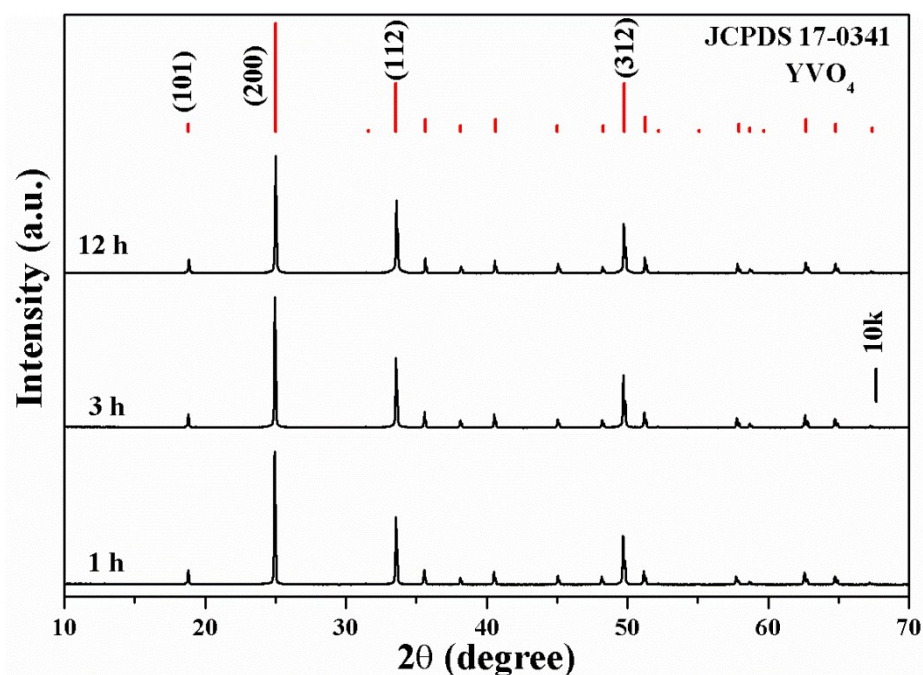

**Fig. S4** XRD patterns of the samples synthesized via hydrothermal reaction for different periods of time under 180 °C and  $\text{VO}_4^{3-}/(\text{Y}_{0.95}\text{Eu}_{0.05})^{3+}$  molar ratio  $R = 1.0$ .

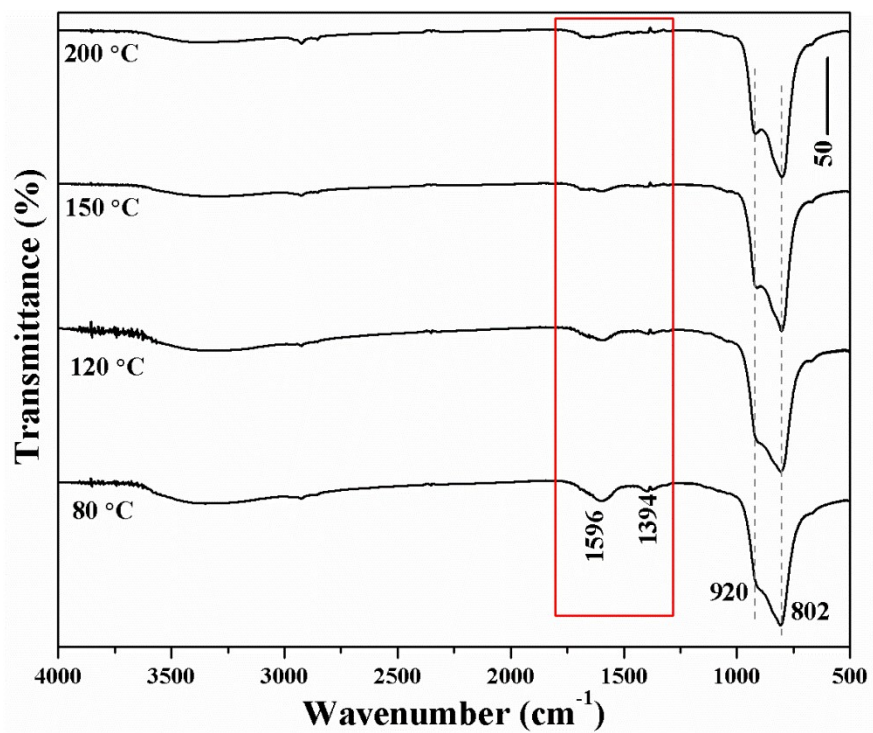

**Fig. S5** FTIR spectra of the products synthesized via hydrothermal reaction under different temperatures (80-200 °C) for 24 h, where  $\text{VO}_4^{3-}/(\text{Y}_{0.95}\text{Eu}_{0.05})^{3+}$  molar ratio  $R = 1.0$ .
